# Supplementary material for: Automated dose dispensing service for primary healthcare patients: a systematic review
Source: Syst Rev. 2013 Jan 8;2:1. doi: 10.1186/2046-4053-2-1 (PMC3598731; doi:10.1186/2046-4053-2-1)
Supplement: Additional file 1 — Quality assessment of the selected studies with the STROBE checklist. [file 2046-4053-2-1-S1.pdf]

**Additional file 1** Quality assessment of the selected studies with the STROBE checklist.

| Section/topic             | No | Content                                                                                                                                                                                    | Sjöberg et al. 2012 [15] | Sjöberg et al. 2011 [16] | Wekre et al. 2010 [17] | Johnell & Fastbom 2008 [18] | Olsson et al. 2010 [19] | van den Bemt et al. 2009 [20] | Bergman et al. 2007 [21] |
|---------------------------|----|--------------------------------------------------------------------------------------------------------------------------------------------------------------------------------------------|--------------------------|--------------------------|------------------------|-----------------------------|-------------------------|-------------------------------|--------------------------|
| <b>Title and abstract</b> |    |                                                                                                                                                                                            |                          |                          |                        |                             |                         |                               |                          |
|                           | 1  | (a) Indicate the study's design with a commonly used term in the title or the abstract                                                                                                     | N                        | Y                        | Y                      | Y                           | Y                       | Y                             | Y                        |
|                           |    | (b) Provide in the abstract an informative and balanced summary of what was done and what was found                                                                                        | Y                        | Y                        | Y                      | Y                           | Y                       | Y                             | Y                        |
| <b>Introduction</b>       |    |                                                                                                                                                                                            |                          |                          |                        |                             |                         |                               |                          |
| Background/<br>rationale  | 2  | Explain the scientific background and rationale for the investigation being reported                                                                                                       | Y                        | Y                        | Y                      | Y                           | Y                       | Y                             | Y                        |
| Objectives                | 3  | State the specific objectives, including any pre-specified hypotheses                                                                                                                      | Y                        | Y                        | Y                      | Y                           | Y                       | Y                             | Y                        |
| <b>Methods</b>            |    |                                                                                                                                                                                            |                          |                          |                        |                             |                         |                               |                          |
| Study design              | 4  | Present key elements of study design early in the paper                                                                                                                                    | N                        | N                        | Y                      | Y                           | Y                       | Y                             | P                        |
| Setting                   | 5  | Describe the settings, locations, and relevant dates, including periods of recruitment, exposure, follow up, and data collection                                                           | Y                        | Y                        | Y                      | Y                           | Y                       | Y                             | Y                        |
| Participants              | 6  | (a) <i>Cohort study</i> – Give the eligibility criteria, and the sources and methods of selection of participants. Describe methods of follow-up                                           | -                        | -                        | Y                      | -                           | -                       | -                             | -                        |
|                           |    | <i>Case-control study</i> —Give the eligibility criteria, and the sources and methods of case ascertainment and control selection. Give the rationale for the choice of cases and controls | Y                        | Y                        | -                      | Y                           | -                       | -                             | -                        |
|                           |    | <i>Cross-sectional study</i> – Give the eligibility criteria, and the sources and methods of selection of participants                                                                     | -                        | -                        | -                      | -                           | Y                       | P                             | Y                        |
|                           |    | (b) <i>Cohort study</i> – For matched studies, give matching criteria and number of exposed and unexposed                                                                                  | -                        | -                        | -                      | -                           | -                       | -                             | -                        |

|                              |    |                                                                                                                                                                                       |   |   |   |   |   |   |   |
|------------------------------|----|---------------------------------------------------------------------------------------------------------------------------------------------------------------------------------------|---|---|---|---|---|---|---|
|                              |    | Case-control study—For matched studies, give matching criteria and the number of controls per case                                                                                    | P | - | - | Y | - | - | - |
| Variables                    | 7  | Clearly define all outcomes, exposures, predictors, potential confounders, and effect modifiers. Give diagnosis criteria, if applicable.                                              | Y | Y | Y | Y | Y | Y | Y |
| Data sources/<br>measurement | 8  | For each variable of interest, give sources of data and details of methods of assessment (measurement). Describe comparability of assessment methods if there is more than one group. | P | Y | Y | Y | P | Y | P |
| Bias                         | 9  | Describe any efforts to address potential sources of bias                                                                                                                             | Y | Y | Y | P | N | Y | N |
| Study size                   | 10 | Explain how the study size was arrived at                                                                                                                                             | N | Y | P | Y | P | P | P |
| Quantitative<br>variables    | 11 | Explain how quantitative variables were handled in the analyses. If applicable, describe which groupings were chosen and why                                                          | P | Y | Y | Y | N | Y | N |
| Statistical<br>methods       | 12 | (a) Describe all statistical methods, including those used to control for confounding                                                                                                 | Y | Y | Y | Y | Y | Y | Y |
|                              |    | (b) Describe any methods used to examine subgroups and interactions                                                                                                                   | Y | Y | - | Y | Y | Y | Y |
|                              |    | (c) Explain how missing data were addressed                                                                                                                                           | - | - | - | - | - | - | - |
|                              |    | (d) Cohort study – If applicable, explain how loss to follow-up was addressed                                                                                                         | - | - | - | - | - | - | - |
|                              |    | Case-control study—If applicable, explain how matching of cases and controls was addressed                                                                                            | - | - | - | - | - | - | - |
|                              |    | Cross-sectional study – If applicable, describe analytical methods taking account of sampling strategy                                                                                | - | - | - | - | - | - | - |
|                              |    | (e) Describe any sensitivity analyses                                                                                                                                                 | - | - | - | - | - | - | - |
| Results                      |    |                                                                                                                                                                                       |   |   |   |   |   |   |   |
| Participants                 | 13 | (a) Report numbers of individuals at each stage of study                                                                                                                              | Y | Y | Y | Y | Y | Y | Y |
|                              |    | (b) Give reasons for non-participation at each stage                                                                                                                                  | Y | - | Y | - | - | - | - |
|                              |    | (c) Consider use of a flow diagram                                                                                                                                                    | Y | - | - | - | - | - | - |
| Descriptive data             | 14 | (a) Give characteristics of study participants and information on exposures and potential confounders                                                                                 | Y | Y | Y | Y | Y | Y | Y |
|                              |    | (b) Indicate number of participants with missing data for each variable of interest                                                                                                   | - | - | Y | - | - | P | - |

|                          |    |                                                                                                                                                                                |              |              |              |              |              |              |              |
|--------------------------|----|--------------------------------------------------------------------------------------------------------------------------------------------------------------------------------|--------------|--------------|--------------|--------------|--------------|--------------|--------------|
|                          |    | (c) <i>Cohort study</i> —Summarise follow-up time                                                                                                                              | -            | -            | Y            | -            | -            | Y            | -            |
| Outcome data             | 15 | <i>Cohort study</i> —Report numbers of outcome events or summary measures over time                                                                                            | -            | -            | Y            | -            | -            | -            | -            |
|                          |    | <i>Case-control study</i> —Report numbers in each exposure category, or summary measures of exposure                                                                           | Y            | Y            | -            | Y            | -            | -            | -            |
|                          |    | <i>Cross-sectional study</i> —Report numbers of outcome events or summary measures                                                                                             | -            | -            | -            | -            | Y            | Y            | Y            |
| Main results             | 16 | (a) Give unadjusted estimates and, if applicable, confounder-adjusted estimates and their precision. Make clear which confounders were adjusted for and why they were included | Y            | Y            | Y            | Y            | P            | Y            | P            |
|                          |    | (b) Report category boundaries when continuous variables were categorized                                                                                                      | -            | -            | -            | -            | -            | -            | -            |
|                          |    | (c) If relevant, consider translating estimates of relative risk into absolute risk for a meaningful time period                                                               | -            | -            | -            | -            | -            | -            | -            |
| Other analyses           | 17 | Report other analyses done—e.g. analyses of subgroups and interactions, and sensitivity analyses                                                                               | -            | -            | -            | Y            | Y            | Y            | Y            |
| <b>Discussion</b>        |    |                                                                                                                                                                                |              |              |              |              |              |              |              |
| Key results              | 18 | Summarise key results with reference to study objectives                                                                                                                       | Y            | Y            | Y            | Y            | Y            | Y            | Y            |
| Limitations              | 19 | Discuss limitations of the study, taking into account sources of potential bias or imprecision. Discuss both direction and magnitude of any potential bias                     | Y            | Y            | Y            | Y            | P            | Y            | P            |
| Interpretation           | 20 | Give a cautious overall interpretation of results considering objectives, limitations, multiplicity of analyses, results from similar studies, and other relevant evidence     | Y            | Y            | Y            | Y            | Y            | Y            | Y            |
| Generalisability         | 21 | Discuss the generalisability (external validity) of the study results                                                                                                          | N            | P            | Y            | N            | N            | Y            | Y            |
| <b>Other information</b> |    |                                                                                                                                                                                |              |              |              |              |              |              |              |
| Funding                  | 22 | Give the source of funding and the role of the funders for the present study and, if applicable, for the original study on which the present article is based                  | Y            | Y            | Y            | Y            | Y            | Y            | N            |
|                          |    | <b>The proportion of adequately reported questions (yes) to applicable questions</b>                                                                                           | <b>19/26</b> | <b>21/23</b> | <b>24/25</b> | <b>23/25</b> | <b>16/24</b> | <b>23/26</b> | <b>16/24</b> |

Y=yes, N=no, P=partly, "-"= not applicable
